# Supplementary material for: Ni(OH)2–Ag hybrid nanosheet array with ultralow Ag loading as a highly efficient and stable electrocatalyst for hydrogen evolution reaction
Source: Royal Society of Chemistry journal article supplement (doi:10.1039/d1nj02621f), 2021-01-01
Supplement: d1nj02621f1.pdf [file d1nj02621f1.pdf]

## Supporting Information

### **Ni(OH)<sub>2</sub>-Ag hybrid nanosheets array with ultralow Ag loading as Highly Efficient and Stable Electrocatalysts for Hydrogen Evolution Reaction**

Tong Xu, Jianzhi Wang, Miao Wang, Yanan Xue, Jie Liu, Ning Cai, Weimin Chen,  
Fuhua Huang, Xugen Li, and Faquan Yu.\*

Key Laboratory for Green Chemical Process of Ministry of Education,  
Hubei Key Laboratory for Novel Reactor and Green Chemistry Technology,  
Hubei Engineering Research Center for Advanced Fine Chemicals,  
School of Chemical Engineering and Pharmacy,  
Wuhan Institute of Technology, Wuhan 430205, (P.R. China).

Corresponding Author:

Faquan Yu, Professor, PhD

Wuhan Institute of Technology

LiuFang Campus, No.206, Guanggu 1st road, Wuhan 430205, Hubei, China

E-mail address: [fyu@wit.edu.cn](mailto:fyu@wit.edu.cn), [fyuwucn@gmail.com](mailto:fyuwucn@gmail.com)

---

\* Corresponding author. Email: [fyu@wit.edu.cn](mailto:fyu@wit.edu.cn), [fyuwucn@gmail.com](mailto:fyuwucn@gmail.com).

Tel: (86-27) 87194980,

Fax: (86-27) 87194465

**Table S1.** Comparison of the HER activity for several recently reported highly active transition metal oxides electrocatalysts in 1.0 M alkaline solution.

| Catalyst                                                | Current density<br>(mA/cm <sup>2</sup> ) | Overpotential<br>(mV) | Electrolyte | Reference |
|---------------------------------------------------------|------------------------------------------|-----------------------|-------------|-----------|
| Ni(OH) <sub>2</sub> -Ag/NF                              | 10                                       | 89                    | 1.0M KOH    | This work |
| Ni(OH) <sub>2</sub> @Ni <sub>3</sub> S <sub>2</sub> /NF | 10                                       | 140                   | 1.0M KOH    | [S1]      |
| MoS <sub>2</sub> @Ni(OH) <sub>2</sub> /NF               | 10                                       | 134                   | 1.0M KOH    | [S2]      |
| Ni/Ni(OH) <sub>2</sub>                                  | 10                                       | 168                   | 1.0M KOH    | [S3]      |
| Ni/Ni(OH) <sub>2</sub> -Ag                              | 10                                       | 148                   | 1.0M KOH    | [S4]      |

In order to obtain the optimal reaction conditions for the material, a series of controlled experiments were conducted with changing the hydrothermal reaction time and pH value of the mixed solution of silver nitrate and ammonia water. Then the electrocatalytic performances of the obtained catalyst for HER were tested in a conventional three-electrode configuration in 1.0 M KOH aqueous electrolyte, and the temperature was maintained at room temperature. Table S2 shows the results. The reaction time and the pH of the reaction environment do have an effect on the hydrogen evolution performance. It can be found that the lowest HER overpotential of the material at  $10 \text{ mA}\cdot\text{cm}^{-2}$  is obtained when the hydrothermal reaction time is 6 h and the pH of the mixed solution is 7.61, indicating that silver-modified  $\text{Ni}(\text{OH})_2$  can indeed improve the electrocatalytic activity.

**Table S2.** HER overpotential at  $10 \text{ mA}\cdot\text{cm}^{-2}$  under different experimental conditions

| 时间 (h) | pH=7.24  | pH=7.40  | pH=7.61  | pH=7.86  |
|--------|----------|----------|----------|----------|
|        | HER (mV) | HER (mV) | HER (mV) | HER (mV) |
| 4      | 148      | 122      | 123      | 154      |
| 5      | 112      | 128      | 112      | 119      |
| 6      | 109      | 103      | 89       | 115      |
| 7      | 120      | 119      | 115      | 113      |
| 8      | 124      | 123      | 116      | 116      |

Table S1. Table of the mass loading of Ag and Ni by ICP-MS.

| Elements | Weight Percent/% |
|----------|------------------|
| Ag       | 2.02             |
| Ni       | 75.32            |

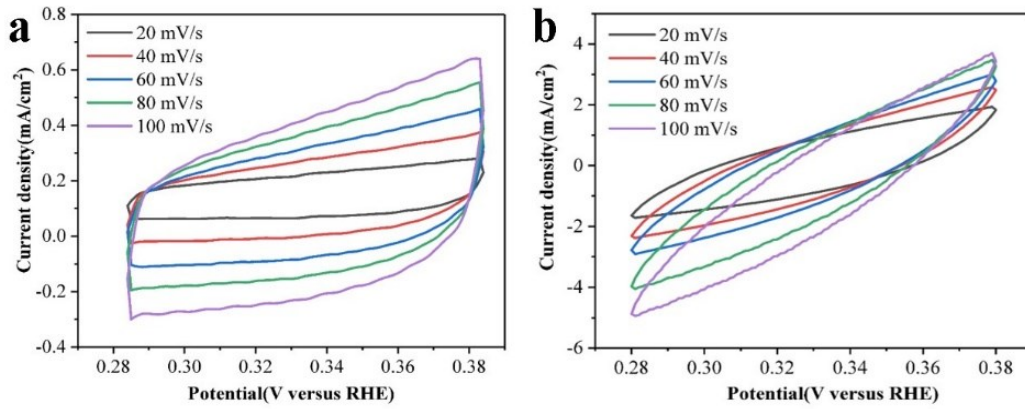

Figure S1. Cyclic voltammograms (CVs) of Ni(OH)<sub>2</sub>-Ag/NF (a), and Ni(OH)<sub>2</sub>/NF (b).

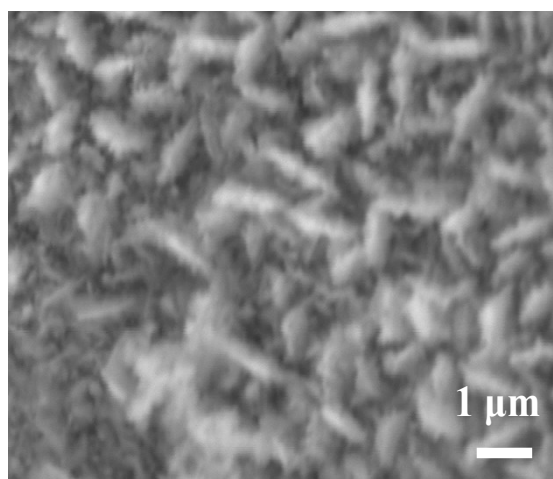

**Figure S2.** SEM images of Ni(OH)<sub>2</sub>-Ag/NF after electrolysis.

To compare the LSV curves for the optimal sample in N<sub>2</sub> and H<sub>2</sub> saturated electrolyte, related measurement was implemented and there is little difference between them, shown in Figure S3.

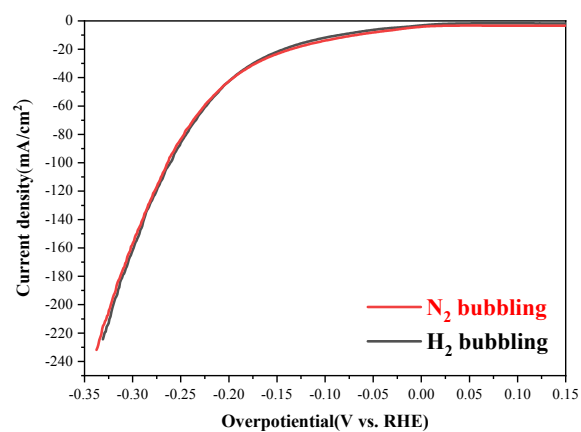

**Figure S3.** LSV curves in N<sub>2</sub> and H<sub>2</sub> saturated KOH.

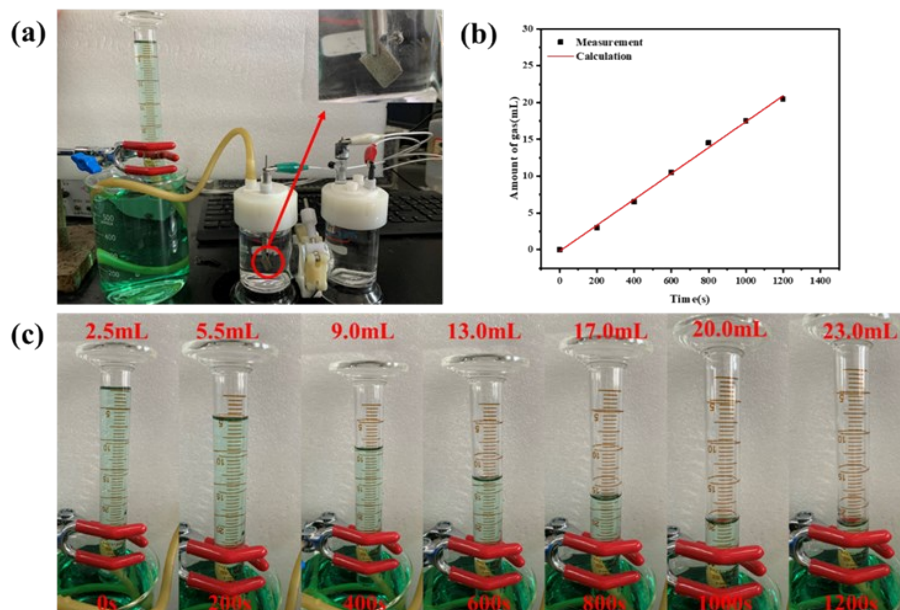

**Figure S4.** (a) Digital photos of FE test equipment; (b) Amount of experimental and theoretical H<sub>2</sub> by Ni(OH)<sub>2</sub>-Ag/NF (1×1 cm<sup>2</sup>) at a constant oxidative current of 10 mA; (c) Digital photos of experimental gas evolution's volume change by Ni(OH)<sub>2</sub>-Ag/NF at a constant oxidative current of 10 mA.

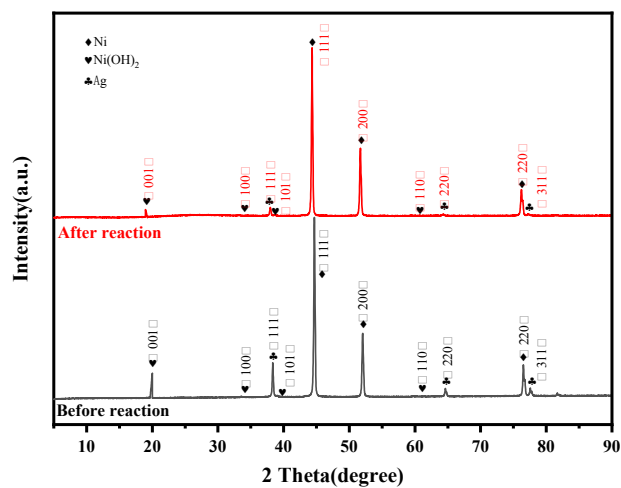

**Figure S5.** The XRD pattern of Ni(OH)<sub>2</sub>-Ag/NF before and after stability measurement.

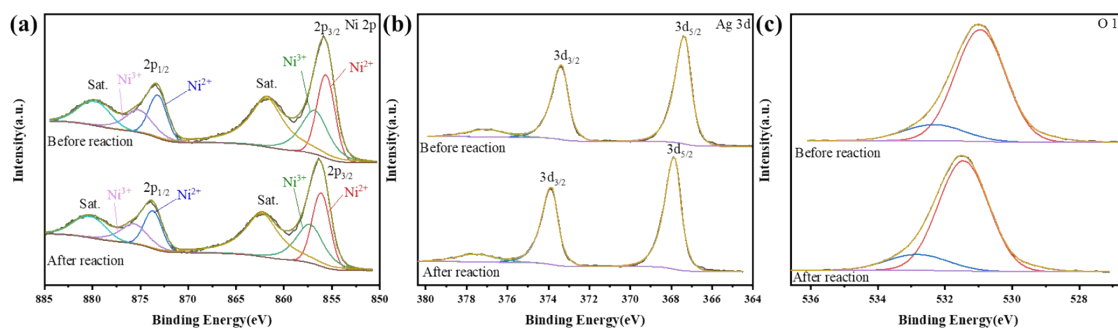

**Figure S6.** The XPS pattern of Ni(OH)<sub>2</sub>-Ag/NF before and after stability measurement.

## References

- [S1] X. Chen, L. Yang, Y. Huang, S. Ge, H. Zhang, Y. Cui, A. Huang, Z. Xiao, *Chem. Eur. J.* 2020, **26**, 1111-1116.
- [S2] C. Wei, C. Liu, L. Gao, Y. Sun, Q. Liu, X. Zhang, J Guo, *Journal of Alloys and Compounds*, 2019, **796**, 86-92.
- [S3] D. Lim, S. Kim, N. Kim, E. Oh, S. Baeck, *ACS Sustainable Chem. Eng.*, 2020, **8**, 4431-4439.
- [S4] L. Zan, H. Zhang, H. Tang, Q. Wei, Y. Zhao, Z. Wang, F. Fu, *Electrochimica Acta*, 2020, **341**, 136051.
